# Supplementary material for: Association of cerebral blood flow with myelin content in cognitively unimpaired adults
Source: PubMed Central journal article supplement — BMJ Neurol Open. 2020 Jul 1;2(1):e000053. doi: 10.1136/bmjno-2020-000053 (PMC7903181; doi:10.1136/bmjno-2020-000053), 2020-07-01
Supplement: bmjno-2020-000053supp001.pdf [file bmjno-2020-000053supp001.pdf]

## Association of cerebral blood flow with myelin content in cognitively unimpaired adults

|                     |                 | $R_2/R_1$     |                  |       |
|---------------------|-----------------|---------------|------------------|-------|
|                     |                 | Age           | Age <sup>2</sup> | CBF   |
| White matter<br>CBF | Whole brain     | < <b>0.01</b> | > 0.1            | > 0.1 |
|                     | Frontal lobes   | < <b>0.01</b> | > 0.1            | > 0.1 |
|                     | Occipital lobes | < <b>0.01</b> | > 0.1            | > 0.1 |
|                     | Parietal lobes  | < <b>0.01</b> | > 0.1            | > 0.1 |
|                     | Temporal lobes  | < <b>0.05</b> | > 0.1            | > 0.1 |
|                     | Cerebellum      | < <b>0.05</b> | > 0.1            | > 0.1 |
| Gray matter<br>CBF  | Whole brain     | < <b>0.01</b> | > 0.1            | > 0.1 |
|                     | Frontal lobes   | < <b>0.05</b> | > 0.1            | > 0.1 |
|                     | Occipital lobes | < <b>0.01</b> | > 0.1            | > 0.1 |
|                     | Parietal lobes  | < <b>0.01</b> | > 0.1            | > 0.1 |
|                     | Temporal lobes  | < <b>0.01</b> | > 0.1            | > 0.1 |
|                     | Cerebellum      | < <b>0.01</b> | > 0.1            | > 0.1 |

**Table 1, SM.** Significance,  $p$ -value, of the regression terms incorporated in the multiple linear regression. CBF: cerebral blood flow,  $R_1$ : longitudinal relaxation rate,  $R_2$ : transverse relaxation rate. Bold indicates significance ( $p < 0.05$ ) or close to significance ( $p < 0.1$ ). All  $p$ -values presented are obtained after FDR correction.

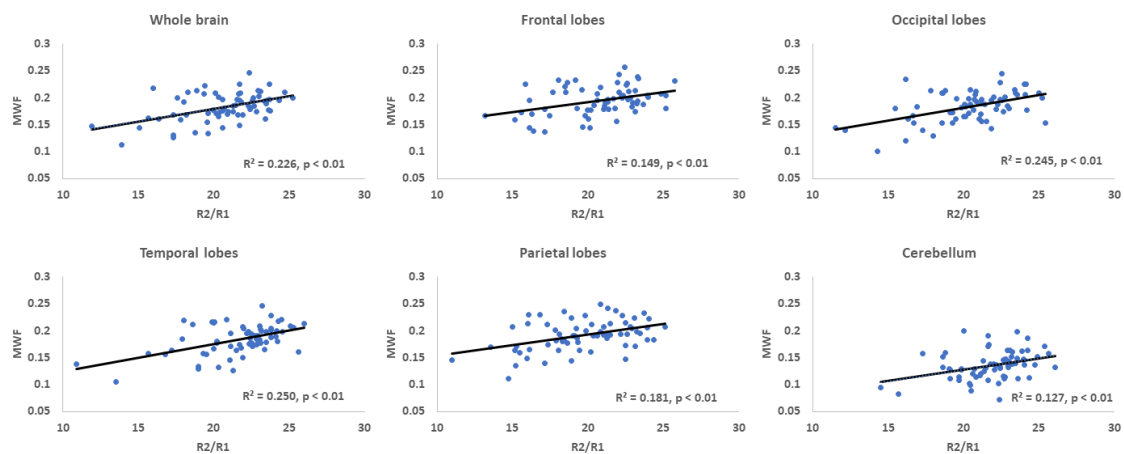

**Figure 1, SM.** Correlation analysis of MWF vs.  $R_2/R_1$ . Results indicate low to modest regional correlations between  $R_2/R_1$  and MWF; this agrees with the recent observation of Uddin and colleagues (Ref. 37).
